# Supplementary material
Source: MDPI journal article supplement (https://www.mdpi.com/2072-4292/15/10/2639)
Supplement: s1 [file s1]

## Supplementary Materials

In this supplementary material, we include the  $\beta$ -parameter values of the BRDF model for each band at each site.

**Table S1.**  $\beta$ -parameter values of BRDF model for each band of the four sites in RadCalNet.

| $\beta$ - parameter | Blue      | Green      | Red       | NIR       | SWIR1      | SWIR2      |
|---------------------|-----------|------------|-----------|-----------|------------|------------|
| <b>GONA</b>         |           |            |           |           |            |            |
| $\beta_0$           | 0.1942    | 0.2449     | 0.3312    | 0.4279    | 0.4198     | 0.2836     |
| $\beta_1$           | 0.0309    | 0.0179     | 0.0067    | 0.0198    | -0.0282    | -0.0216    |
| $\beta_2$           | -0.0174   | 0.0586     | 0.0795    | 0.1322    | 0.0003     | -0.2014    |
| $\beta_3$           | 56.6231   | -117.0817  | -7.1729   | 170.7997  | -61.2838   | 82.8315    |
| $\beta_4$           | 1.5762    | -5.2964    | 1.5704    | 11.0030   | -3.9000    | 6.3157     |
| $\beta_5$           | 0.0619    | 0.0293     | 0.0274    | 0.0327    | -0.0540    | -0.0038    |
| $\beta_6$           | 1.1216    | -0.7590    | -1.3644   | 3.7047    | -5.0462    | -10.8533   |
| $\beta_7$           | 25.1113   | -48.0963   | 1.7053    | 85.2478   | -26.8172   | 47.7926    |
| $\beta_8$           | -0.0579   | 0.1071     | 0.4681    | -0.1385   | -0.1159    | 0.3586     |
| $\beta_9$           | -0.0391   | 0.4654     | 1.9513    | -0.4718   | -0.8497    | 1.6585     |
| $\beta_{10}$        | 0.4856    | -0.2212    | -0.2746   | 1.1603    | -0.9299    | -1.6689    |
| $\beta_{11}$        | 0.0173    | -0.0622    | -0.0857   | -0.1830   | 0.0341     | 0.2788     |
| $\beta_{12}$        | -0.0552   | -0.0369    | -0.0402   | -0.0339   | 0.0326     | -0.0097    |
| $\beta_{13}$        | -0.5006   | 0.3527     | 0.1162    | -1.0007   | 0.5655     | 0.4092     |
| $\beta_{14}$        | -1.1041   | 1.8216     | 0.3375    | -3.9876   | 3.5967     | 3.7535     |
| <b>BSCN</b>         |           |            |           |           |            |            |
| $\beta_0$           | 0.2100    | 0.2466     | 0.2941    | 0.3329    | 0.4578     | 0.4275     |
| $\beta_1$           | 0.1414    | 0.0820     | 0.0808    | 0.0754    | 0.0208     | 0.0221     |
| $\beta_2$           | 0.0565    | 0.0172     | 0.0673    | 0.0196    | -0.1232    | -0.0148    |
| $\beta_3$           | -33.3577  | -43.0226   | -57.6669  | -36.6507  | -32.0074   | -64.9839   |
| $\beta_4$           | -1.0939   | -2.8762    | -1.9833   | -1.0056   | -5.0487    | -3.4685    |
| $\beta_5$           | -0.1502   | -0.1190    | -0.0832   | -0.0493   | -0.0888    | -0.0654    |
| $\beta_6$           | 1.3747    | 1.5968     | 0.0446    | -0.9570   | -1.8404    | -3.2720    |
| $\beta_7$           | -13.4629  | -20.1913   | -22.9393  | -15.6485  | -21.0909   | -27.4112   |
| $\beta_8$           | 0.1059    | 0.0344     | 0.1057    | 0.0880    | 0.2114     | 0.3107     |
| $\beta_9$           | 0.1873    | -0.1326    | 0.2468    | 0.1011    | 0.5802     | 1.0331     |
| $\beta_{10}$        | 0.4094    | 0.4310     | 0.0645    | -0.1209   | -0.2982    | -0.8318    |
| $\beta_{11}$        | -0.1001   | -0.0932    | -0.1046   | -0.0298   | -0.0172    | -0.0704    |
| $\beta_{12}$        | 0.1786    | 0.1253     | 0.1191    | 0.1034    | 0.0716     | 0.0593     |
| $\beta_{13}$        | -0.1656   | -0.1745    | -0.1485   | -0.1617   | 0.2618     | 0.3193     |
| $\beta_{14}$        | -0.8201   | -0.9938    | -0.6905   | -0.6658   | 0.6949     | 0.9119     |
| <b>RVUS</b>         |           |            |           |           |            |            |
| $\beta_0$           | 0.4369    | 0.4352     | 0.4765    | 0.5300    | 0.4471     | 0.3686     |
| $\beta_1$           | -0.0845   | -0.0907    | -0.0879   | -0.0506   | -0.0888    | -0.1053    |
| $\beta_2$           | 0.8082    | 0.5720     | 0.5603    | 0.6313    | 0.1764     | 0.1225     |
| $\beta_3$           | -492.0854 | -1081.4238 | -577.8887 | -483.1813 | -1400.6257 | -1406.6570 |
| $\beta_4$           | -30.4916  | -72.8282   | -38.4486  | -30.9730  | -97.9369   | -97.6660   |
| $\beta_5$           | -0.0983   | -0.0388    | -0.0529   | -0.1044   | 0.0560     | 0.0595     |
| $\beta_6$           | -0.1700   | -5.4076    | -3.7345   | 1.1586    | -15.9721   | -25.4322   |
| $\beta_7$           | -240.9016 | -556.4975  | -294.5386 | -241.7216 | -736.5707  | -736.1198  |
| $\beta_8$           | 0.5498    | 0.7023     | 0.3726    | 0.3474    | 0.5661     | 0.3305     |
| $\beta_9$           | 1.4747    | 2.1700     | 0.8324    | 0.6919    | 1.6659     | 0.8030     |
| $\beta_{10}$        | -0.9294   | -1.9235    | -1.3597   | -0.0185   | -4.3131    | -6.9448    |

|                                 |           |           |           |           |          |         |
|---------------------------------|-----------|-----------|-----------|-----------|----------|---------|
| $\beta_{11}$                    | -0.7381   | -0.5003   | -0.5082   | -0.5478   | -0.0925  | -0.0975 |
| $\beta_{12}$                    | -0.0099   | -0.0277   | -0.0150   | 0.0307    | -0.0534  | -0.0753 |
| $\beta_{13}$                    | 0.7370    | 1.3011    | 0.8403    | 0.4125    | 2.1459   | 2.7950  |
| $\beta_{14}$                    | 1.3922    | 3.9522    | 2.2388    | 0.6376    | 7.5803   | 10.0859 |
| <b>LCFR (winter and spring)</b> |           |           |           |           |          |         |
| $\beta_0$                       | 0.1732    | 0.1547    | 0.1818    | 0.2407    | 0.3953   | 0.2463  |
| $\beta_1$                       | 0.1139    | 0.0731    | 0.0952    | -0.0695   | 0.0520   | 0.0360  |
| $\beta_2$                       | -0.1454   | -0.2535   | -0.2743   | 0.1938    | -0.0853  | -0.1615 |
| $\beta_3$                       | -166.9405 | -335.8937 | -127.4251 | -275.4070 | -28.7870 | 42.0968 |
| $\beta_4$                       | -12.2237  | -26.6966  | -7.9157   | -27.9834  | 2.3551   | 9.1422  |
| $\beta_5$                       | -0.1396   | -0.2110   | -0.3571   | 0.1881    | -0.5281  | -0.3527 |
| $\beta_6$                       | -10.3153  | 1.7055    | 14.6080   | 12.8559   | 11.6643  | 1.3564  |
| $\beta_7$                       | -90.3189  | -190.4231 | -66.5719  | -178.2133 | -3.1975  | 40.3630 |
| $\beta_8$                       | -0.5930   | -0.0120   | 0.6243    | 1.1102    | -0.5027  | -0.1163 |
| $\beta_9$                       | -2.3934   | -0.1572   | 2.1094    | 4.7086    | -1.5253  | -0.1927 |
| $\beta_{10}$                    | -2.4431   | 0.4045    | 4.1773    | 1.5874    | 2.7972   | -0.1582 |
| $\beta_{11}$                    | 0.0225    | 0.1108    | 0.0974    | -0.0233   | -0.1282  | -0.0048 |
| $\beta_{12}$                    | 0.1808    | 0.1903    | 0.2853    | -0.1203   | 0.3159   | 0.2268  |
| $\beta_{13}$                    | 0.6245    | 0.0352    | -0.9160   | 0.2884    | -1.2462  | 0.1221  |
| $\beta_{14}$                    | 2.4121    | -0.0351   | -3.2822   | -0.5359   | -4.8672  | -0.1094 |
| <b>LCFR (summer and autumn)</b> |           |           |           |           |          |         |
| $\beta_0$                       | 0.1121    | 0.1211    | 0.0754    | 0.2279    | 0.1699   | 0.1006  |
| $\beta_1$                       | 0.0326    | -0.0055   | 0.0357    | 0.1267    | -0.1990  | -0.0861 |
| $\beta_2$                       | -0.2210   | -0.2482   | -0.5671   | -0.5409   | -0.8146  | -0.5823 |
| $\beta_3$                       | 13.9829   | 377.2091  | -6.9885   | -338.2802 | 241.2931 | 54.3164 |
| $\beta_4$                       | 1.9037    | 28.4906   | -0.8263   | -22.4589  | 19.0073  | 5.3180  |
| $\beta_5$                       | -0.0351   | -0.0932   | 0.0716    | 0.0459    | 0.1832   | 0.2198  |
| $\beta_6$                       | -0.0023   | 7.9535    | 14.1269   | -4.5146   | 10.5600  | 9.8906  |
| $\beta_7$                       | 9.4409    | 205.2955  | -9.4838   | -176.4434 | 130.9474 | 30.7915 |
| $\beta_8$                       | -0.2826   | -0.6519   | -0.2770   | 0.6572    | -1.3553  | -1.8502 |
| $\beta_9$                       | -1.1519   | -2.8682   | -2.1237   | 1.7057    | -5.4539  | -7.3037 |
| $\beta_{10}$                    | 0.0907    | 2.0337    | 2.7281    | -1.4361   | 2.6910   | 2.2921  |
| $\beta_{11}$                    | 0.1800    | 0.1428    | 0.5607    | 0.4688    | 0.7610   | 0.5970  |
| $\beta_{12}$                    | 0.0494    | 0.0480    | 0.0726    | 0.1847    | -0.1617  | -0.0827 |
| $\beta_{13}$                    | -0.1585   | -1.1664   | -1.0181   | 1.0244    | -1.7114  | -1.7591 |
| $\beta_{14}$                    | -0.6853   | -4.7292   | -5.2700   | 3.0660    | -6.7345  | -7.0850 |
